# Supplementary material for: An oxylipin signal confers protection against antifungal echinocandins in pathogenic aspergilli
Source: PubMed Central journal article supplement (PMC11069582; doi:10.1038/s41467-024-48231-2), 2024-05-04
Supplement: 41467_2024_48231_MOESM1_ESM.pdf [file 41467_2024_48231_MOESM1_ESM.pdf]

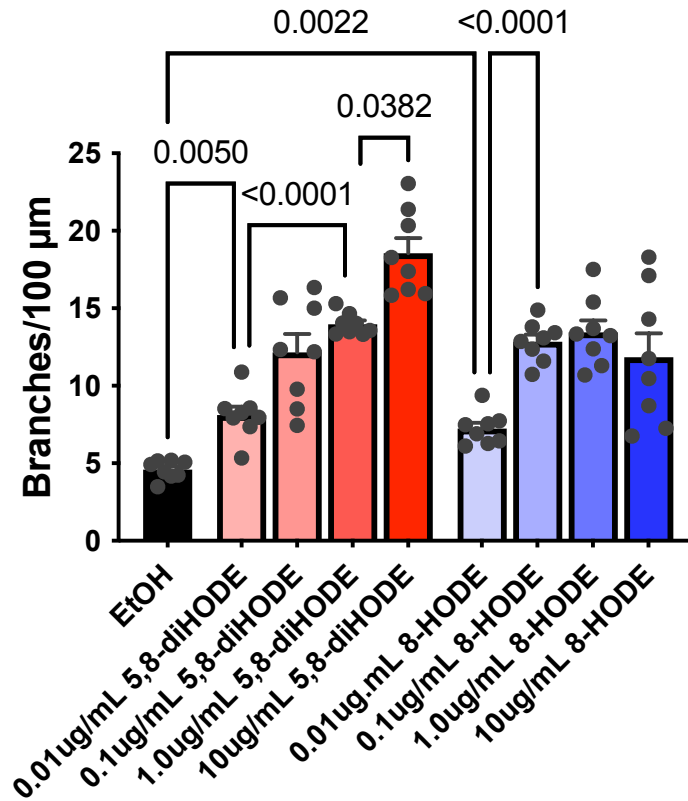

**Supplementary Figure 1. 5,8-diHODE and 8-HODE increase lateral branching in WT *A. fumigatus* Af293.** Lateral branches per 100 μm of hyphae were assessed for eight hyphae of *A. fumigatus* WT Af293 grown for twenty hours in GMM with 1% EtOH, 5,8-diHODE, or 8-HODE treatment. Data points represent individual hyphae (n = 8) and error bars represent SEM. P values were determined by Browne-Forsythe and Welch ANOVA with Dunnett's T3 multiple comparisons tests. \* denotes p<0.05, \*\* denotes p<0.01, and \*\*\*\* denotes p<0.0001.

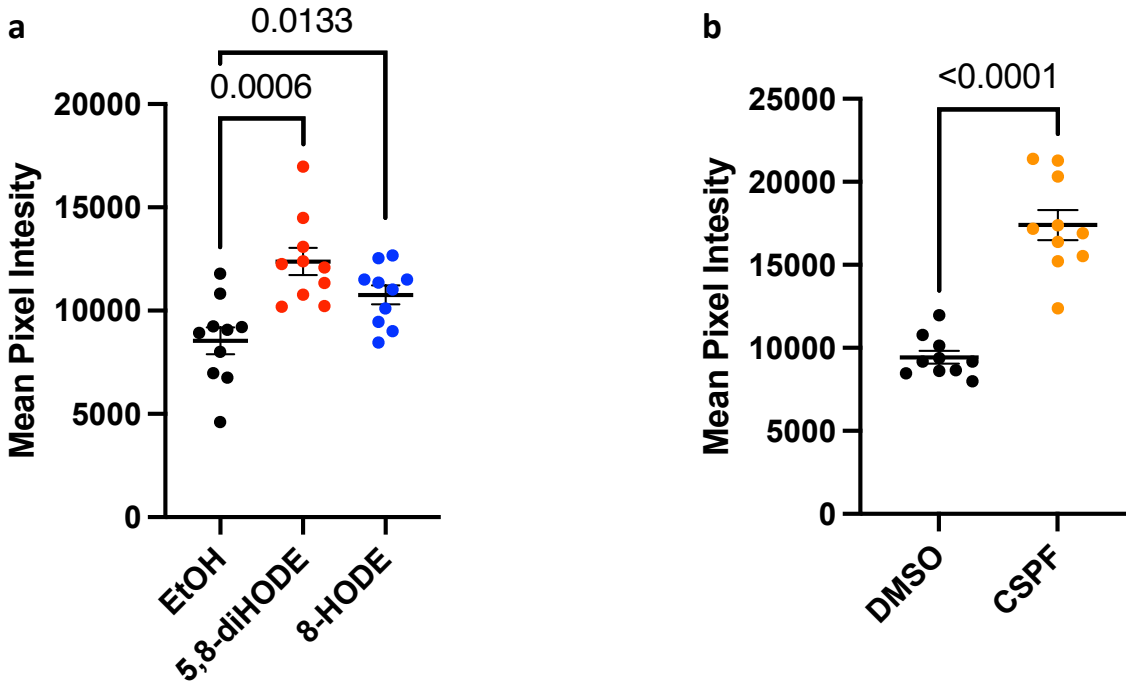

**Supplementary Figure 2. 5,8-diHODE, 8-HODE, and caspofungin treatments increase cell wall chitin in *A. fumigatus* hyphae.** (a) Mean calcofluor white intensity per pixel of WT Af293 hyphae grown for 15 hours in GMM with 1% EtOH, 1  $\mu\text{g}/\text{mL}$  5,8-diHODE, or 1  $\mu\text{g}/\text{mL}$  8-HODE before staining and epifluorescent imaging. (b) Mean calcofluor white intensity per pixel of WT Af293 hyphae grown for 15 hours in GMM with 1% DMSO or 1  $\mu\text{g}/\text{mL}$  caspofungin for 15 hours before staining and epifluorescent imaging. (a,b) Data points represent individual hyphae ( $n = 10$ ) and error bars represent SEM. P values shown were calculated using two-sided Welch's t-test.

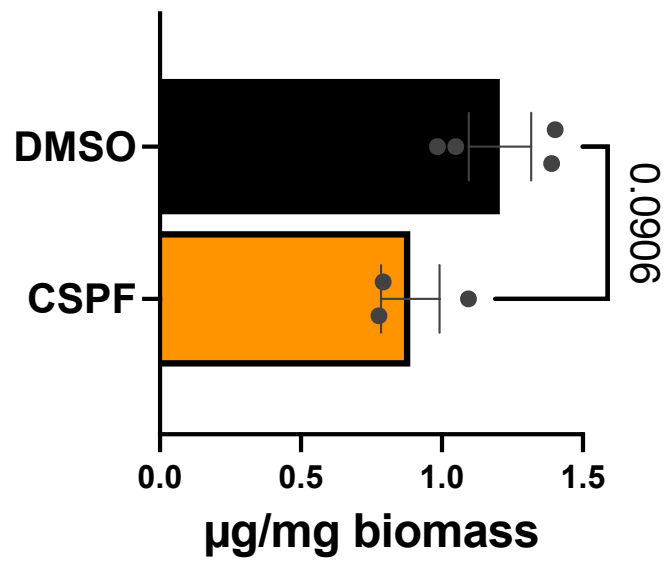

**Supplementary Figure 3. Caspofungin treatment does not impact 10-HODE production by PpoC.** 10-HODE per milligram of dry biomass extracted from fungal tissue. WT *A. fumigatus* Af293 was grown at 37° C and 250 RPM for 24 hours in GMM plus 48 hours more after the addition of 0.02% DMSO (n = 4) or 2 µg/mL CSPF (n = 3). Oxylipins were extracted using mixed organic solvent and quantified on UHPLC-MS/MS by comparison to standard curves of purified oxylipin. Data points represent independent culture flasks and error bars denote SEM. P value shown was determined by Welch's two-sided t-test.

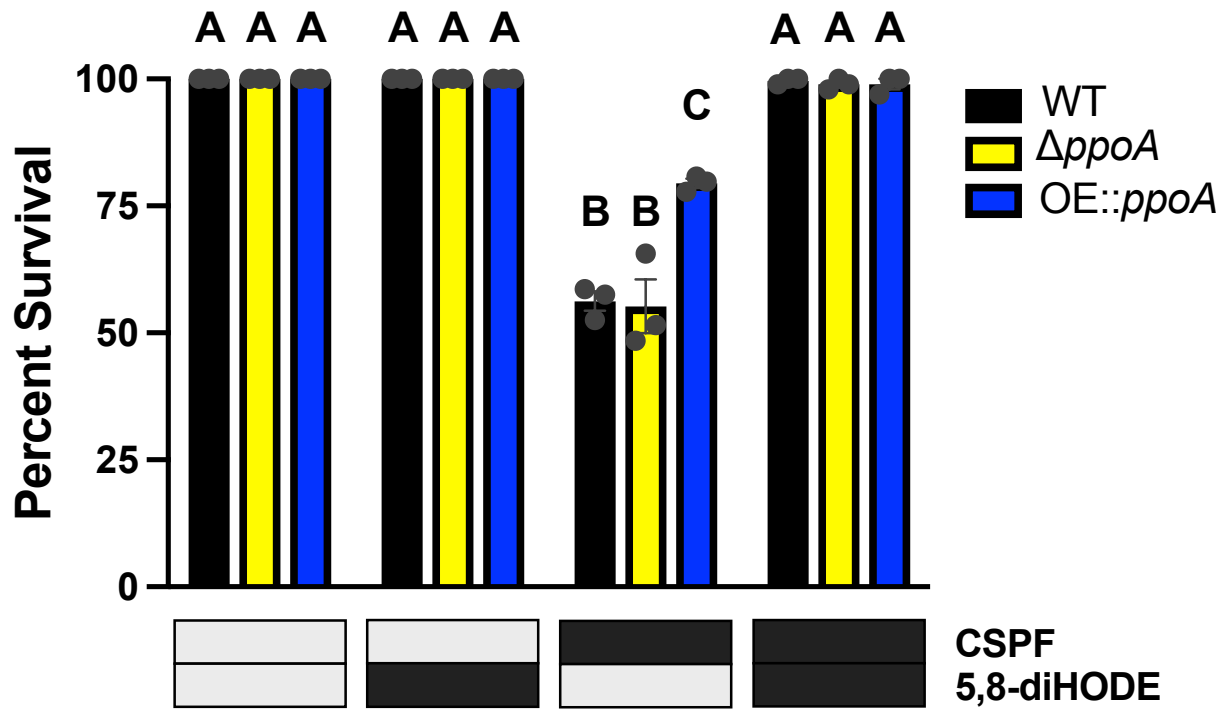

**Supplementary Figure 4. Overexpression of *ppoA* is protective against echinocandin tip lysis.**

Percent survival of *A. fumigatus* Af293 WT,  $\Delta ppoA$ , and OE::*ppoA* germlings treated with 1  $\mu\text{g}/\text{mL}$  CSPF or 1% DMSO vehicle and 10  $\mu\text{g}/\text{mL}$  5,8-diHODE or 1% EtOH vehicle after 16 hours at 37° C in YMM. Data points each represent percent survival of 99 germlings assessed in biologically independent samples (n = 3) with errors bars representing SEM. Conditions with p values less than 0.05 calculated by two-way ANOVA with Tukey's multiple comparisons are indicated by distinct letters. Exact p values are provided in the source data file.

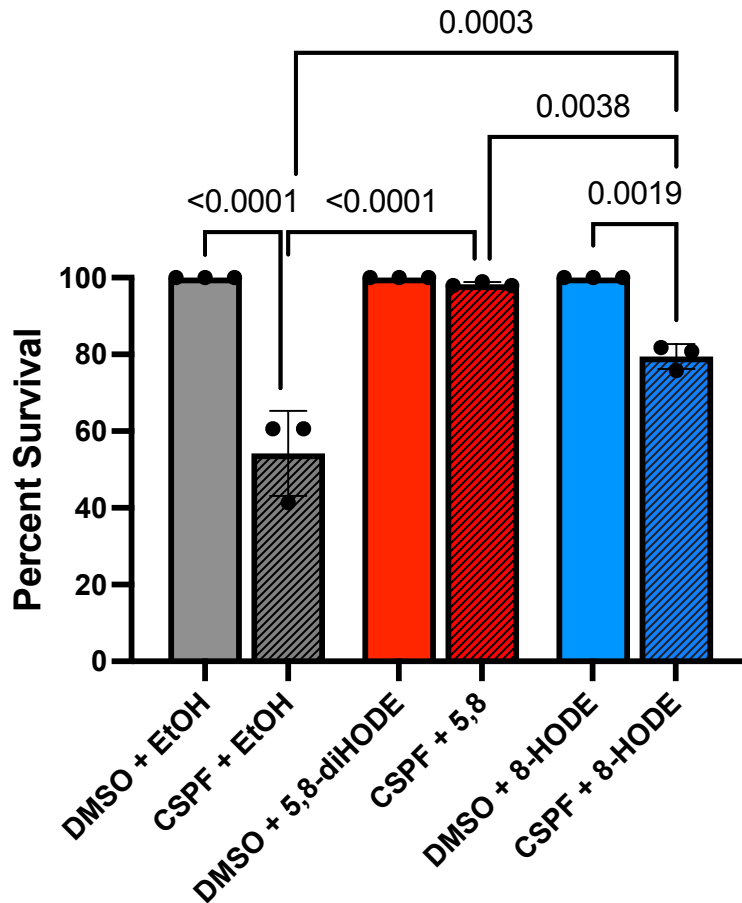

**Supplementary Figure 5. Cotreatment with 5,8-diHODE protects WT *A. fumigatus* AfS35 against caspofungin mediated tip lysis.** Percent survival of WT *A. fumigatus* AfS35 germlings treated with 2  $\mu\text{g}/\text{mL}$  CSPF or 1% DMSO vehicle and 10  $\mu\text{g}/\text{mL}$  5,8-diHODE, 10 $\mu\text{g}/\text{mL}$  8-HODE or 1% EtOH vehicle after 16 hours at 37° C in GMM. P values shown were calculated by one-way ANOVA with Tukey's multiple comparisons. Data points each represent percent survival of 99 germlings assessed in biologically independent samples (n = 3) with errors bars representing SEM.

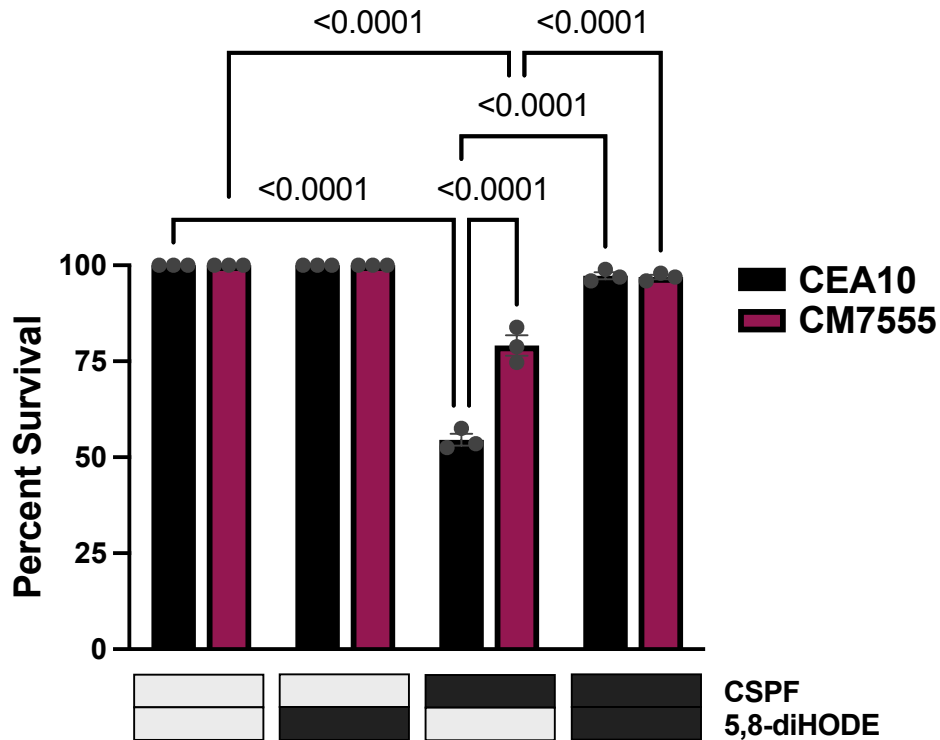

**Supplementary Figure 6. Cotreatment with 5,8-diHODE protects WT *A. fumigatus* CM7555 against caspofungin mediated tip lysis.** Percent survival of WT *A. fumigatus* isolates CEA10 and CM7555 germlings treated with 2  $\mu\text{g}/\text{mL}$  CSPF or 1% DMSO vehicle and 10  $\mu\text{g}/\text{mL}$  5,8-diHODE or 1% EtOH vehicle after 16 hours growth in GMM. P values were calculated by two-way ANOVA with Tukey's multiple comparisons. Data points each represent percent survival of 99 germlings assessed in biologically independent samples ( $n = 3$ ) with errors bars representing SEM.

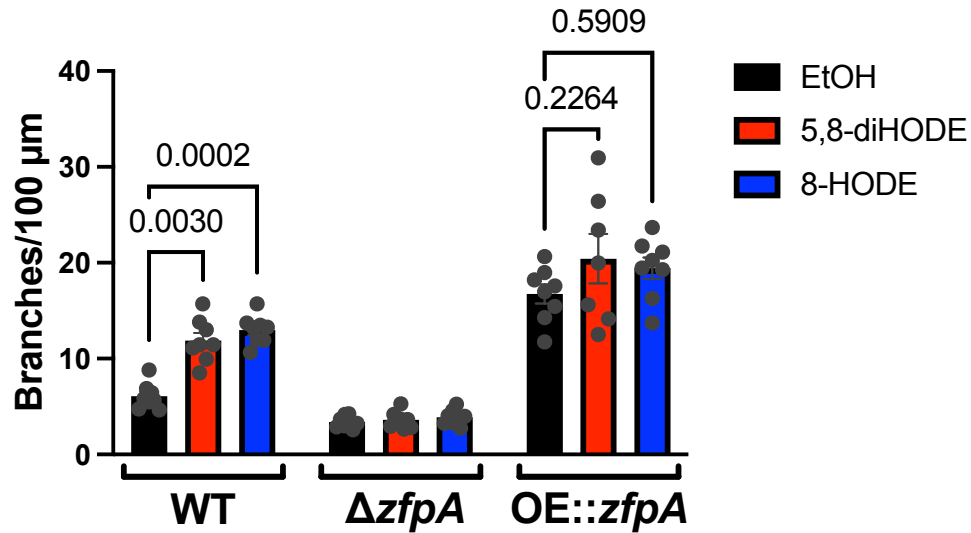

**Supplementary Figure 7. ZfpA is necessary for hyperbranching response to the PpoA oxylipins 5,8-diHODE and 8-HODE.** Lateral branches per 100 μm of hypha were assessed for seven or eight hyphae of *A. fumigatus* Af293 WT,  $\Delta zfpA$ , and OE::zfpA strains grown for twenty hours in GMM with 1% EtOH, 0.1 μg/mL 5,8-diHODE, or 0.1 μg/mL 8-HODE. Data points represent individual hyphae (n = 7 or 8) and error bars represent SEM. P values shown were determined by two-way ANOVA with Tukey's multiple comparisons tests.

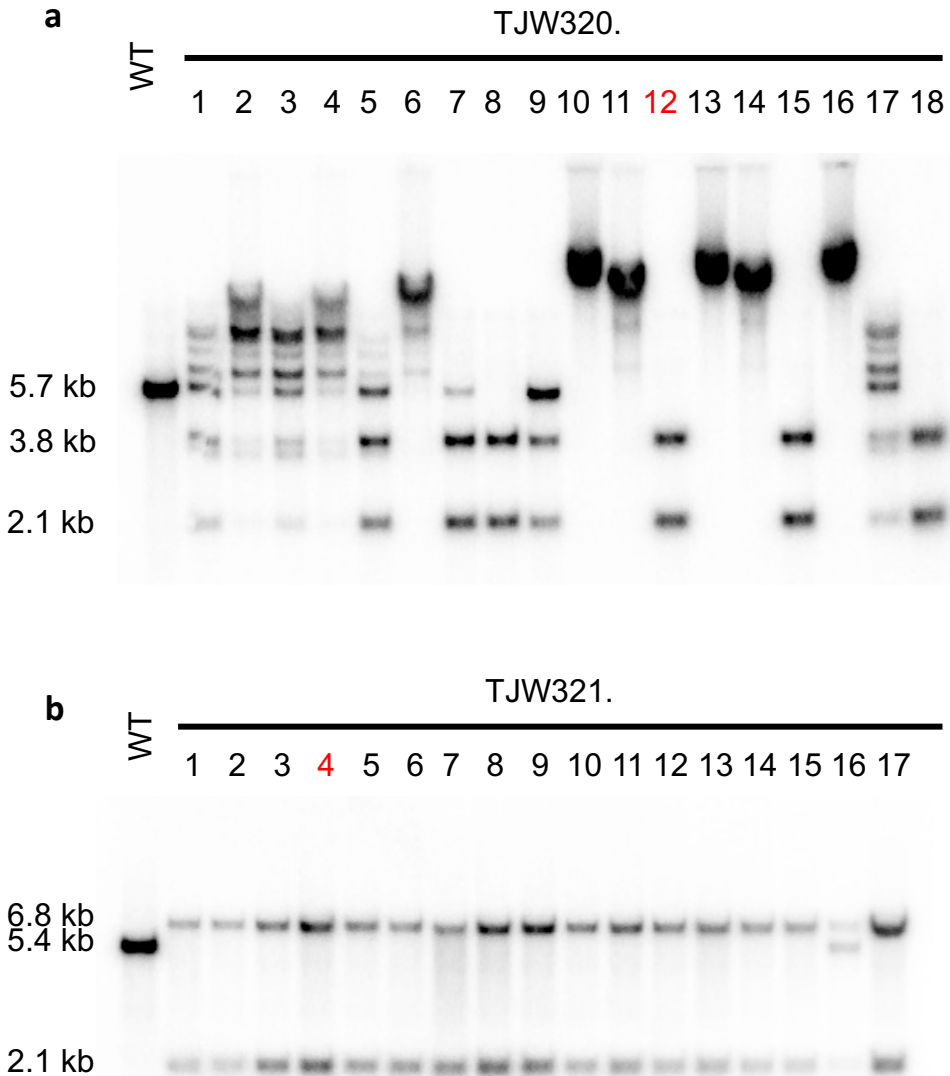

**Supplementary Figure 8. Southern blot confirmation of *A. flavus zfpA* mutants.** (A) Deletion mutant Southern confirmation. Genomic DNA was digested by *EcoRI*. Wild type band should be present at 5.7 kb and  $\Delta zfpA$  bands at 3.8 and 2.1 kb. TJW320.12 was chosen for the subsequent experiments. (B) Overexpression mutant Southern confirmation. Genomic DNA was digested by *NcoI*. Wild type band should be present at 5.4 kb and OE::*zfpA* bands at 6.8 and 2.1 kb. TJW321.4 was chosen for the subsequent experiments.



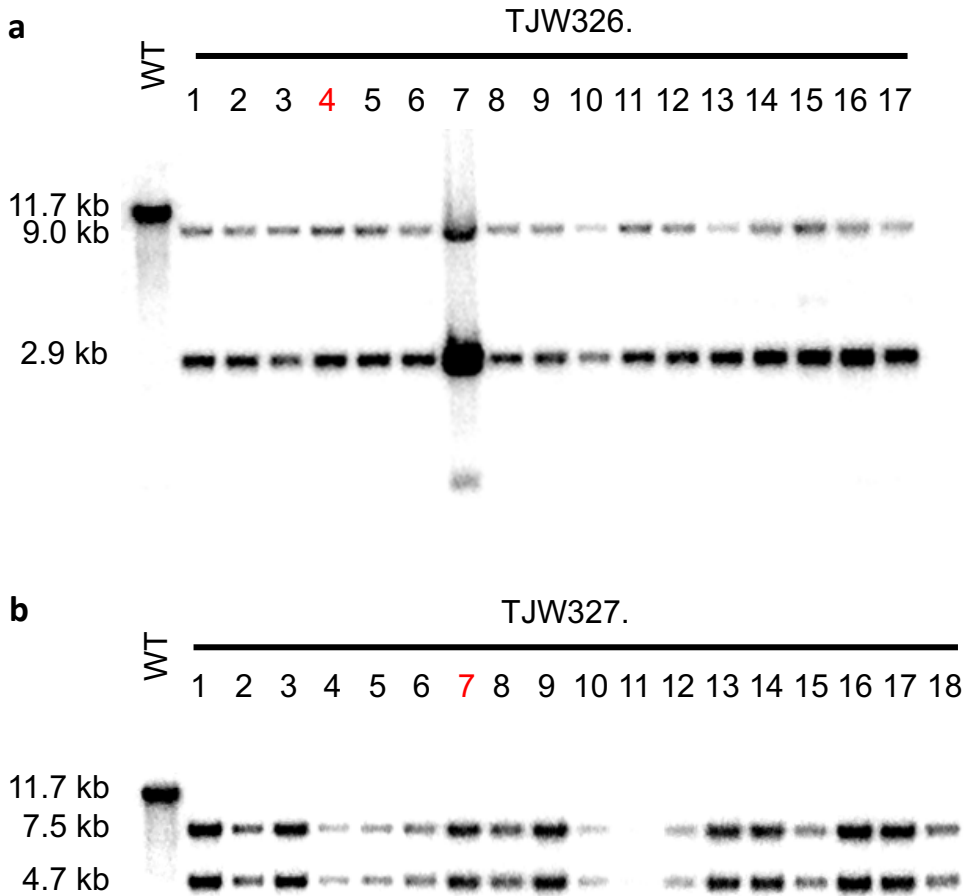

**Supplementary Figure 9. Southern blot confirmation of *A. nidulans zfpA* mutants.** (A) Deletion mutant Southern blot confirmation. Genomic DNA was digested by *PvuII*. Wild type band can be observed at 11.7 kb and  $\Delta zfpA$  bands at 9 and 2.9 kb. TJW326.4 was chosen for the subsequent experiments. (B) Overexpression mutant Southern confirmation. Genomic DNA was digested by *PvuII*. Wild type band can be observed at 11.7 kb and OE::*zfpA* bands at 7.5 and 4.7 kb. TJW327.7 was chosen for the subsequent experiments.

## OE::*zfpA*

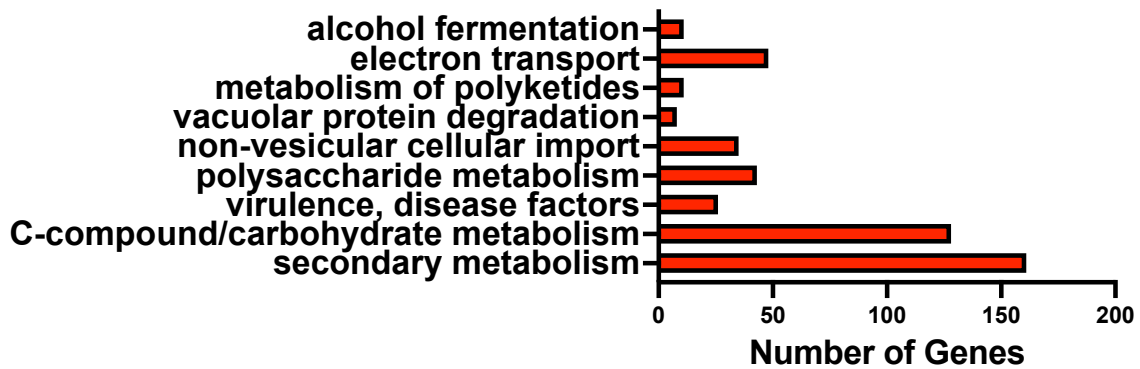

## $\Delta$ *zfpA*

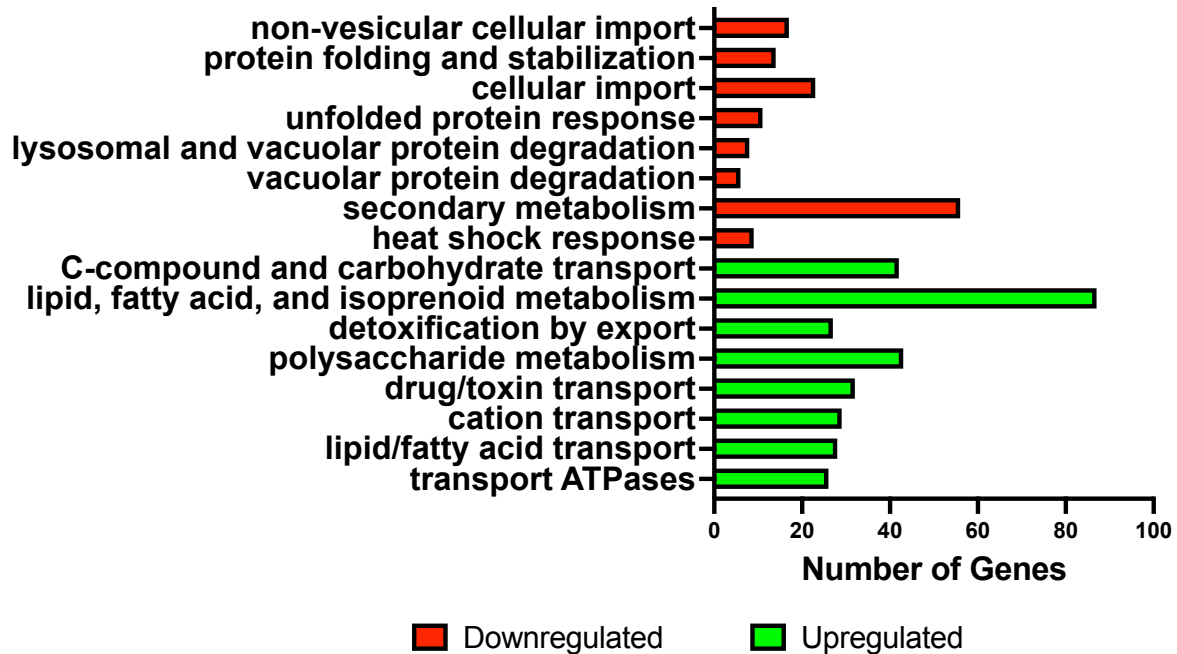

**Supplementary Figure 10. ZfpA regulates genes involved in diverse cellular processes.** Functional category enrichment of genes significantly up- and downregulated in the OE::*zfpA* and  $\Delta$ *zfpA* mutants relative to WT Af293 (Benjamini-Hochberg FDR < 0.05). Differentially expressed genes were defined as  $|\text{Log}_2\text{FC}| \geq 1$  and  $p. \text{adj.} < 0.01$ .

| Strain Name                          | Background | Organism            | Genotype                                                                                                                                                        | Source           |
|--------------------------------------|------------|---------------------|-----------------------------------------------------------------------------------------------------------------------------------------------------------------|------------------|
| WT Af293                             | Af293      | <i>A. fumigatus</i> | Wild type                                                                                                                                                       | Clinical Isolate |
| TDWC1.13                             | Af293      | <i>A. fumigatus</i> | <i>pyrG1</i> ; $\Delta$ <i>ppoA</i> :: <i>A.p.pyrG</i>                                                                                                          | 1                |
| WT CEA10                             | CEA10      | <i>A. fumigatus</i> | Wild type                                                                                                                                                       | Clinical Isolate |
| CM7555                               | CM7555     | <i>A. fumigatus</i> | Wild type                                                                                                                                                       | 2                |
| AfS35                                | D141       | <i>A. fumigatus</i> | $\Delta$ <i>akuA</i> :: <i>loxP</i>                                                                                                                             | 3                |
| TFYL81.5                             | Af293      | <i>A. fumigatus</i> | <i>pyrG1</i> ; <i>argB1</i> ; $\Delta$ <i>akuA</i> :: <i>mluc</i> ; <i>A.fu.argB</i> ; <i>A.fu.pyrG</i>                                                         | 4                |
| TJW213.1                             | Af293      | <i>A. fumigatus</i> | <i>pyrG1</i> ; <i>argB1</i> ; $\Delta$ <i>akuA</i> :: <i>mluc</i> ; <i>A.fu.argB</i> ; $\Delta$ <i>zfpA</i> :: <i>A.p.pyrG</i>                                  | 5                |
| TJW214.2                             | Af293      | <i>A. fumigatus</i> | <i>pyrG1</i> ; <i>argB1</i> ; $\Delta$ <i>akuA</i> :: <i>mluc</i> ; <i>A.fu.argB</i> ; <i>A.p.pyrG</i> :: <i>A.n.gpdA(p)</i> :: <i>zfpA</i>                     | 5                |
| TDGC1.2                              | CEA10      | <i>A. fumigatus</i> | <i>pyrG1</i> ; $\Delta$ <i>akuB</i> ; $\Delta$ <i>argB</i> ; <i>A.fu.argB</i> :: <i>A.n.gpdA(p)</i> ::RFP; <i>A.fu.pyrG</i>                                     | 5                |
| TJW215.1                             | CEA10      | <i>A. fumigatus</i> | <i>pyrG1</i> ; $\Delta$ <i>akuB</i> ; $\Delta$ <i>argB</i> ; <i>A.fu.argB</i> :: <i>A.n.gpdA(p)</i> ::RFP; $\Delta$ <i>zfpA</i> :: <i>A.p.pyrG</i>              | 5                |
| TJW216.1                             | CEA10      | <i>A. fumigatus</i> | <i>pyrG1</i> ; $\Delta$ <i>akuB</i> ; $\Delta$ <i>argB</i> ; <i>A.fu.argB</i> :: <i>A.n.gpdA(p)</i> ::RFP; <i>A.p.pyrG</i> :: <i>A.n.gpdA(p)</i> :: <i>zfpA</i> | 5                |
| $\Delta$ <i>akuB</i> <sup>KU80</sup> | CEA10      | <i>A. fumigatus</i> | $\Delta$ <i>akuB</i> :: <i>A.fu.pyrG</i>                                                                                                                        | 6                |
| $\Delta$ <i>mpkA</i>                 | CEA10      | <i>A. fumigatus</i> | $\Delta$ <i>akuB</i> :: <i>pyrG</i> ; <i>mpkA</i> :: <i>ptrA</i>                                                                                                | 7                |
| <i>mpkA</i> <sup>C</sup>             | CEA10      | <i>A. fumigatus</i> | $\Delta$ <i>akuB</i> :: <i>pyrG</i> ; <i>mpkA</i> :: <i>mpkA</i> <sup>+</sup> :: <i>hygR</i>                                                                    | 7                |
| $\Delta$ <i>crzA</i>                 | CEA10      | <i>A. fumigatus</i> | $\Delta$ <i>akuB</i> ; $\Delta$ <i>crzA</i> :: <i>pyrG</i>                                                                                                      | 8                |
| <i>crzA</i> <sup>C</sup>             | CEA10      | <i>A. fumigatus</i> | $\Delta$ <i>akuB</i> ; $\Delta$ <i>crzA</i> :: <i>crzA</i> <sup>+</sup> :: <i>pyrG</i>                                                                          | 8                |
| WT NRRL 3357                         | NRRL 3357  | <i>A. flavus</i>    | Wild type                                                                                                                                                       | Peanut Isolate   |
| WT FGSC A4                           | FGSC A4    | <i>A. nidulans</i>  | Wild type                                                                                                                                                       | Soil Isolate     |
| TJW149.27                            | NRRL 3357  | <i>A. flavus</i>    | $\Delta$ <i>nkuA</i>                                                                                                                                            | 9                |
| TJES19.1                             | NRRL 3357  | <i>A. flavus</i>    | <i>pyrG</i> <sup>-</sup> ; $\Delta$ <i>nkuA</i>                                                                                                                 | 10               |
| TJ320.12                             | NRRL 3357  | <i>A. flavus</i>    | <i>A.p.pyrG</i> :: <i>A.n.gpd(p)</i> :: <i>Afl.zfpA</i> ; $\Delta$ <i>ku70</i>                                                                                  | This study       |
| TJW321.4                             | NRRL 3357  | <i>A. flavus</i>    | <i>A.p.pyrG</i> :: <i>A.n.gpd(p)</i> :: <i>A.fl.zfpA</i> ; $\Delta$ <i>ku70</i>                                                                                 | This study       |
| RDIT9.32                             | FGSC A4    | <i>A. nidulans</i>  | <i>veA</i>                                                                                                                                                      | 11               |
| RJMP1.49                             | FGSC A4    | <i>A. nidulans</i>  | <i>pyrG89</i> ; <i>veA</i>                                                                                                                                      | 12               |
| RTMH217.13                           | FGSC A4    | <i>A. nidulans</i>  | <i>pyrG89</i> ; <i>veA</i>                                                                                                                                      | 13               |

|          |         |                    |                                                                                             |            |
|----------|---------|--------------------|---------------------------------------------------------------------------------------------|------------|
| TJW326.4 | FGSC A4 | <i>A. nidulans</i> | $\Delta A.n.zfpA::A.p.pyrG$ ; <i>pyroA4</i> ,<br>$\Delta nkuA::argB$ ; <i>veA</i>           | This study |
| RJW343.2 | FGSC A4 | <i>A. nidulans</i> | $\Delta A.n.zfpA::A.p.pyrG$ ; <i>veA</i>                                                    | This study |
| TJW327.7 | FGSC A4 | <i>A. nidulans</i> | <i>A.p.pyrG::A.n.gpd(p)::A.n.zfpA</i> ,<br><i>pyroA4</i> ; $\Delta nkuA::argB$ ; <i>veA</i> | This study |
| RJW344.1 | FGSC A4 | <i>A. nidulans</i> | <i>A.p.pyrG::A.n.gpd(p)::A.n.zfpA</i> ,<br><i>veA</i>                                       | This study |

**Supplementary Table 1.** Fungal strains used in this study.

| Name                                          | 5' → 3'                                                        |
|-----------------------------------------------|----------------------------------------------------------------|
| <b><u>A. nidulans zfpA knock out</u></b>      |                                                                |
| Anzfpko5'F                                    | TCATCAGCAGCATCATCGTCGG                                         |
| Anzfpko5'R                                    | CGATATCAAGCTATCGATACCTCGACTCTTT<br>GACGGTGTGGATCGCGATGAGAGTCCG |
| parapyrGF                                     | GTCGACGGTATCGATAAGCTTG                                         |
| parapyrGR                                     | ATTGACAATCGGAGAGGCTGC                                          |
| Anzfpko3'F                                    | GTCGCTGCAGCCTCTCCGATTGTCGAA<br>TCTTATATGCATGATGATAGCGGCATTTTGG |
| Anzfpko3'R                                    | TGCAATGACATGTCCCTCACCC                                         |
| AnzfpkoconfF                                  | TAAGCCTAGTTCCTCACACGCC                                         |
| AnzfpkoconfR                                  | TAGGGCCTATCCTTAGGGTACC                                         |
| <b><u>A. nidulans zfpA overexpression</u></b> |                                                                |
| AnzfpOE5'F                                    | TCATCAGCAGCATCATCGTCGG                                         |
| AnzfpOE5'R                                    | CCAATTCGCCCTATAGTGAGTCGTATTA<br>CGTTTGACGGTGTGGATCGCGATGAGAG   |
| OEPyGF                                        | CGTAATACGACTCACTATAGGGC                                        |
| OEPyGR                                        | GGTGATGTCTGCTCAAGCGGG                                          |
| AnzfpOE3'F                                    | CAGCTACCCCGCTTGAGCAGACATCACCAT<br>GATGGCACTAGAGCCTTCAAGGCAAC   |
| AnzfpOE3'R                                    | AAGCCCTTGATGTGGTACTCGC                                         |
| AnzfpOEconfF                                  | ATTCATCTTCCCATCCAAGAACC                                        |
| AnzfpOEconfR                                  | ATCTTGGCAGTAGTCCGAGACG                                         |
| <b><u>A. flavus zfpA knock out</u></b>        |                                                                |
| Aflzfpko5'F2                                  | TCTGGCGCTCCACATTTCAACC                                         |
| Aflzfpko5'R                                   | CGATATCAAGCTATCGATACCTCGACT<br>CCAAGGGTTGGTATTTTCAGTATGTGGAG   |
| ParapyrGF                                     | GAGTTCGAGGTATCGATAAGCTTG                                       |
| ParapyrGR                                     | ATTGACAATCGGAGAGGCTGC                                          |
| Aflzfpko3'F                                   | GTCGCTGCAGCCTCTCCGATTGTCGAA<br>TGAGACTCCAGTTTCGCAAGTTCGGGTC    |
| Aflzfpko3'R                                   | ACTACATCGATCAAGGGCTGCC                                         |
| AflzfpkoconfF                                 | AGCGGAAAGAGGTCAACACAGG                                         |
| AflzfpkoconfR                                 | TAGGGCCTATCCTTAGGGTACC                                         |
| <b><u>A. flavus zfpA overexpression</u></b>   |                                                                |
| AflzfpOE5'F                                   | TCTGGCGCTCCACATTTCAACC                                         |
| AflzfpOE5'R                                   | CCAATTCGCCCTATAGTGAGTCGTATTACGC<br>AAGGGTTGGTATTTTCAGTATGTGGAG |
| OEPyGF                                        | CGTAATACGACTCACTATAGGGC                                        |
| OEPyGR                                        | GGTGATGTCTGCTCAAGCGGG                                          |

|               |                                 |
|---------------|---------------------------------|
| AflzfpOE3'F   | CAGCTACCCCGCTTGAGCAGACATCACC    |
|               | ATGCAAGGCCACAGTGACCATCCTGACTTTG |
| AflzfpOE3'R   | AAAAGCCGCAGACCATTGTGCC          |
| AflzfpOEconfF | ATTCATCTTCCCATCCAAGAACC         |
| AflzfpOEconfR | AGTCAAGTGCGCTTGAAGACG           |

**Probe templates for Northern**

|                     |                        |
|---------------------|------------------------|
| ppoA_NorthernF      | ACAGGACCTCATCAGGACGTTC |
| ppoA_NorthernR      | AAGTTGGTGCAGAGTCCACTGC |
| A.fl.ppoA_NorthernF | TCATATCTCGATCTCTCGCCGC |
| A.fl.ppoA_NorthernR | AGGGTAGATCTCCACATGGTCC |
| A.fl.gpdA_NorthernF | CTCAAATACGACACCACCCACG |
| A.fl.gpdA_NorthernR | TCCTCGGAAGCAGCCTTGATGG |
| A.n.ppoA_NorthernF  | TTCGCTACCAAGCGAGTGTTGG |
| A.n.ppoA_NorthernR  | TCTATCACCGCGAACCAATGCC |
| A.n.gpdA_NorthernF  | GTATGACTCACAGCACGGTCAG |
| A.n.gpdA_NorthernR  | CTTGAGCTCGTTCTCAGAAGCC |

---

**Supplementary Table 2.** Primers used in this study.

## Supplementary References

1. Dagenais, T. R. T. *et al.* Defects in conidiophore development and conidium-macrophage interactions in a dioxygenase mutant of *Aspergillus fumigatus*. *Infect. Immun.* **76**, 3214–3220 (2008).
2. Valero, C. *et al.* The Caspofungin Paradoxical Effect is a Tolerant “Eagle Effect” in the Filamentous Fungal Pathogen *Aspergillus fumigatus*. *MBio* **13**, e0044722 (2022).
3. Wagener, J. *et al.* The putative alpha-1,2-mannosyltransferase AfMnt1 of the opportunistic fungal pathogen *Aspergillus fumigatus* is required for cell wall stability and full virulence. *Eukaryotic Cell* **7**, 1661–1673 (2008).
4. Throckmorton, K., Lim, F. Y., Kontoyiannis, D. P., Zheng, W. & Keller, N. P. Redundant synthesis of a conidial polyketide by two distinct secondary metabolite clusters in *Aspergillus fumigatus*. *Environ. Microbiol.* **18**, 246–259 (2016).
5. Schoen, T. J. *et al.* *Aspergillus fumigatus* transcription factor ZfpA regulates hyphal development and alters susceptibility to antifungals and neutrophil killing during infection. *PLoS Pathog.* **19**, e1011152 (2023).
6. da Silva Ferreira, M. E. *et al.* The akuB(KU80) mutant deficient for nonhomologous end joining is a powerful tool for analyzing pathogenicity in *Aspergillus fumigatus*. *Eukaryotic Cell* **5**, 207–211 (2006).

7. Valiante, V., Jain, R., Heinekamp, T. & Brakhage, A. A. The MpkA MAP kinase module regulates cell wall integrity signaling and pyomelanin formation in *Aspergillus fumigatus*. *Fungal Genet. Biol.* **46**, 909–918 (2009).
8. Soriani, F. M. *et al.* Functional characterization of the *Aspergillus fumigatus* CRZ1 homologue, CrzA. *Mol. Microbiol.* **67**, 1274–1291 (2008).
9. Zhao, X. *et al.* A Cellular Fusion Cascade Regulated by LaeA Is Required for Sclerotial Development in *Aspergillus flavus*. *Front. Microbiol.* **8**, 1925 (2017).
10. Frawley, D. *et al.* The tetrameric pheromone module SteC-MkkB-MpkB-SteD regulates asexual sporulation, sclerotia formation and aflatoxin production in *Aspergillus flavus*. *Cell. Microbiol.* **22**, e13192 (2020).
11. Tsitsigiannis, D. I., Kowieski, T. M., Zarnowski, R. & Keller, N. P. Endogenous lipogenic regulators of spore balance in *Aspergillus nidulans*. *Eukaryotic Cell* **3**, 1398–1411 (2004).
12. Shaaban, M. *et al.* Involvement of transposon-like elements in penicillin gene cluster regulation. *Fungal Genet. Biol.* **47**, 423–432 (2010).
13. Hammond, T. M., Andrews, M. D., Roossinck, M. J. & Keller, N. P. *Aspergillus* mycoviruses are targets and suppressors of RNA silencing. *Eukaryotic Cell* **7**, 350–357 (2008).
