# Supplementary material for: An oxylipin signal confers protection against antifungal echinocandins in pathogenic aspergilli
Source: PubMed Central journal article supplement (PMC11069582; doi:10.1038/s41467-024-48231-2), 2024-05-04
Supplement: 41467_2024_48231_MOESM3_ESM.pdf [file 41467_2024_48231_MOESM3_ESM.pdf]

## Description of Additional Supplementary Files:

**Supplementary Data 1:** Differentially expressed genes (DEGs) identified in the RNA sequencing experiment. All DEGs with an adjusted p value < 0.01 are listed with  $\text{Log}_2\text{FC}$ , P-values, and adjusted P values designated for each gene.

**Supplementary Movie 1:** Time-lapse of *A. fumigatus* Af293 WT conidia treated with 1% DMSO plus 1% EtOH grown for 24 hours in liquid YMM at 37°C. Images were collected every 15 minutes for 21 hours beginning at 3 hours post inoculation by phase microscopy with a 10X objective. Scale bars represent one-hundred microns.

**Supplementary Movie 2:** Time-lapse of *A. fumigatus* Af293 WT conidia treated with 1% DMSO plus 10 µg/mL 5,8-diHODE grown for 24 hours in liquid YMM at 37°C. Images were collected every 15 minutes for 21 hours beginning at 3 hours post inoculation by phase microscopy with a 10X objective. Scale bars represent one-hundred microns.

**Supplementary Movie 3:** Time-lapse of *A. fumigatus* Af293 WT conidia treated with 1 µg/mL caspofungin plus 1% EtOH grown for 24 hours in liquid YMM at 37°C. Images were collected every 15 minutes for 21 hours beginning at 3 hours post inoculation by phase microscopy with a 10X objective. Scale bars represent one-hundred microns.

**Supplementary Movie 4:** Time-lapse of *A. fumigatus* Af293 WT conidia treated with 1 µg/mL caspofungin plus 10 µg/mL 5,8-diHODE grown for 24 hours in liquid YMM at 37°C. Images were collected every 15 minutes for 21 hours beginning at 3 hours post inoculation by phase microscopy with a 10X objective. Scale bars represent one-hundred microns.

**Supplementary Movie 5:** Time-lapse of *A. fumigatus* CEA10 WT conidia treated with 1% DMSO plus 1% EtOH grown for 24 hours in liquid GMM at 37°C. Images were collected every 15 minutes for 21 hours beginning at 3 hours post inoculation by phase microscopy with a 10X objective. Scale bars represent one-hundred microns.

**Supplementary Movie 6:** Time-lapse of *A. fumigatus* CEA10 WT conidia treated with 1% DMSO plus 10 µg/mL 5,8-diHODE grown for 24 hours in liquid GMM at 37°C. Images were collected every 15 minutes for 21 hours beginning at 3 hours post inoculation by phase microscopy with a 10X objective. Scale bars represent one-hundred microns.

**Supplementary Movie 7:** Time-lapse of *A. fumigatus* CEA10 WT conidia treated with 2 µg/mL caspofungin plus 1% EtOH grown for 24 hours in liquid GMM at 37°C. Images were collected every 15

minutes for 21 hours beginning at 3 hours post inoculation by phase microscopy with a 10X objective. Scale bars represent one-hundred microns.

**Supplementary Movie 8:** Time-lapse of *A. fumigatus* CEA10 WT conidia treated with 2 µg/mL caspofungin plus 10 µg/mL 5,8- diHODE grown for 24 hours in liquid GMM at 37°C. Images were collected every 15 minutes for 21 hours beginning at 3 hours post inoculation by phase microscopy with a 10X objective. Scale bars represent onehundred microns.
